# Supplementary material
Source: ML conference proceedings conference paper supplement (https://proceedings.neurips.cc/paper_files/paper/2014/hash/218a0aefd1d1a4be65601cc6ddc1520e-Abstract.html)
Supplement: Supplementary file [file 218a0aefd1d1a4be65601cc6ddc1520e-Supplemental.zip]

## A Proofs for Section 3

*Proof of Lemma 1.* Without loss of generality, assume that we have reordered coordinates such that  $|z_1| \geq |z_2| \geq \dots \geq |z_I|$ . Since the projection operator  $P_s(\cdot)$  operates by selecting the largest elements by magnitude, we have  $\theta_1 = z_1, \dots, \theta_s = z_s$  and  $\theta_{s+1} = \theta_{s+2} = \dots = \theta_{|I|} = 0$ .

Also define  $\theta^z = P_{s^*}(z)$ . By the above argument, we have  $\theta_1^z = z_1, \dots, \theta_{s^*}^z = z_{s^*}$  and  $\theta_{s^*+1}^z = \theta_{s^*+2}^z = \dots = \theta_{|I|}^z = 0$ . Now we have

$$\begin{aligned} \frac{\|\theta^z - z\|}{|I| - s^*} - \frac{\|\theta - z\|}{|I| - s} &= \frac{1}{|I| - s^*} \sum_{i=s^*+1}^s z_i^2 + \left( \frac{1}{|I| - s^*} - \frac{1}{|I| - s} \right) \sum_{i=s+1}^{|I|} z_i^2 \\ &\geq \frac{s - s^*}{|I| - s^*} z_s^2 + \frac{s^* - s}{(|I| - s^*)(|I| - s)} (|I| - s) z_{s+1}^2 \geq 0, \end{aligned} \quad (9)$$

since the coordinates of  $z$  are arranged in decreasing order of magnitude. Combining the above with the observation that, due to the projection property  $\|\theta^* - z\| \geq \|\theta^z - z\|$ , proves the result.  $\square$

*Proof of Theorem 1.* Recall that  $\theta^{t+1} = P_s(\theta^t - \frac{\eta'}{L} g^t)$  where  $\eta' = \frac{2}{3} < 1$ . Let  $S^t = \text{supp}(\theta^t)$ ,  $S^* = \text{supp}(\theta^*)$ , and  $S^{t+1} = \text{supp}(\theta^{t+1})$ . Also, let  $I^t = S^* \cup S^t \cup S^{t+1}$ .

Now, using the RSS property and the fact that  $\text{supp}(\theta^t) \subseteq I^t$  and  $\text{supp}(\theta^{t+1}) \subseteq I^t$ , we have:

$$\begin{aligned} f(\theta^{t+1}) - f(\theta^t) &\leq \langle \theta^{t+1} - \theta^t, g^t \rangle + \frac{L}{2} \|\theta^{t+1} - \theta^t\|_2^2, \\ &= \frac{L}{2} \|\theta_{I^t}^{t+1} - \theta_{I^t}^t + \frac{\eta'}{L} \cdot g_{I^t}^t\|_2^2 - \frac{(\eta')^2}{2L} \|g_{I^t}^t\|_2^2 + (1 - \eta') \langle \theta^{t+1} - \theta^t, g^t \rangle. \end{aligned} \quad (10)$$

As  $\text{supp}(\theta^t) = S^t$ ,  $\text{supp}(\theta^{t+1}) = S^{t+1}$  and  $S^t \setminus S^{t+1}, S^{t+1}$  are disjoint, we have:

$$\begin{aligned} \langle \theta^{t+1} - \theta^t, g^t \rangle &= -\langle \theta_{S^t \setminus S^{t+1}}^t, g_{S^t \setminus S^{t+1}}^t \rangle + \langle \theta_{S^{t+1}}^{t+1} - \theta_{S^{t+1}}^t, g_{S^{t+1}}^t \rangle, \\ &\stackrel{\zeta_1}{=} -\langle \theta_{S^t \setminus S^{t+1}}^t, g_{S^t \setminus S^{t+1}}^t \rangle - \frac{\eta'}{L} \|g_{S^{t+1}}^t\|_2^2, \\ &\stackrel{\zeta_2}{\leq} \frac{\eta'}{2L} \|g_{S^{t+1} \setminus S^t}^t\|_2^2 - \frac{\eta'}{2L} \|g_{S^t \setminus S^{t+1}}^t\|_2^2 - \frac{\eta'}{L} \|g_{S^{t+1}}^t\|_2^2, \\ &\stackrel{\zeta_3}{=} -\frac{\eta'}{2L} \|g_{S^{t+1} \setminus S^t}^t\|_2^2 - \frac{\eta'}{2L} \|g_{S^t \setminus S^{t+1}}^t\|_2^2 - \frac{\eta'}{L} \|g_{S^t \cap S^{t+1}}^t\|_2^2 \\ &\leq -\frac{\eta'}{2L} \|g_{S^t \cup S^{t+1}}^t\|_2^2, \end{aligned} \quad (11)$$

where the equality  $\zeta_1$  follows from the gradient step, i.e.,  $\theta_{S^{t+1}}^{t+1} = \theta_{S^{t+1}}^t - \frac{\eta'}{L} g_{S^{t+1}}^t$ . The inequality  $\zeta_2$  follows using the fact that  $\theta^{t+1}$  is obtained using hard thresholding and the fact that  $|S^t \setminus S^{t+1}| = |S^{t+1} \setminus S^t|$ , as follows:

$$\|\theta_{S^t \setminus S^{t+1}}^t - \frac{\eta'}{L} g_{S^t \setminus S^{t+1}}^t\|_2^2 \leq \|\theta_{S^{t+1} \setminus S^t}^{t+1}\|_2^2 = \frac{(\eta')^2}{L^2} \|g_{S^{t+1} \setminus S^t}^t\|_2^2. \quad (12)$$

The equality  $\zeta_3$  follows from  $\|g_{S^{t+1}}^t\|_2^2 = \|g_{S^{t+1} \setminus S^t}^t\|_2^2 + \|g_{S^t \cap S^{t+1}}^t\|_2^2$ .

Hence, using (10) and (11), we have:

$$\begin{aligned} f(\theta^{t+1}) - f(\theta^t) &\leq \frac{L}{2} \|\theta_{I^t}^{t+1} - \theta_{I^t}^t + \frac{\eta'}{L} \cdot g_{I^t}^t\|_2^2 - \frac{(\eta')^2}{2L} \|g_{I^t}^t\|_2^2 - \frac{\eta'(1 - \eta')}{2L} \|g_{S^t \cup S^{t+1}}^t\|_2^2, \\ &= \frac{L}{2} \|\theta_{I^t}^{t+1} - \theta_{I^t}^t + \frac{\eta'}{L} \cdot g_{I^t}^t\|_2^2 - \frac{(\eta')^2}{2L} \|g_{I^t \setminus (S^t \cup S^*)}^t\|_2^2 - \frac{(\eta')^2}{2L} \|g_{S^t \cup S^*}^t\|_2^2 \\ &\quad - \frac{\eta'(1 - \eta')}{2L} \|g_{S^t \cup S^{t+1}}^t\|_2^2. \end{aligned} \quad (13)$$

Next, let us try to upper bound the first two terms on the right hand side above. Since  $I^t \setminus (S^t \cup S^*) = S^{t+1} \setminus (S^t \cup S^*) \subseteq S^{t+1}$ , we have  $\theta_{I^t \setminus (S^t \cup S^*)}^{t+1} = \theta_{I^t \setminus (S^t \cup S^*)}^t - \frac{\eta'}{L} g_{I^t \setminus (S^t \cup S^*)}^t$ . However, as

$\boldsymbol{\theta}_{I^t \setminus S^t}^t = 0$ , we actually have  $\boldsymbol{\theta}_{I^t \setminus (S^t \cup S^*)}^{t+1} = -\frac{\eta'}{L} \mathbf{g}_{I^t \setminus (S^t \cup S^*)}^t$ . Now let us choose a set  $R \subseteq S^t \setminus S^{t+1}$  such that  $|R| = |S^{t+1} \setminus (S^t \cup S^*)|$ . Such a choice is possible since  $|S^{t+1} \setminus (S^t \cup S^*)| = |S^t \setminus S^{t+1}| - |(S^{t+1} \cap S^*) \setminus S^t|$  (which itself is a consequence of the fact that  $|S^{t+1}| = |S^t|$ ). Moreover, since  $\boldsymbol{\theta}^{t+1}$  is obtained by hard-thresholding  $(\boldsymbol{\theta}^t - \frac{\eta'}{L} \mathbf{g}^t)$ , for any choice of  $R$  made above, we have:

$$\frac{(\eta')^2}{L^2} \|\mathbf{g}_{I^t \setminus (S^t \cup S^*)}^t\|_2^2 = \|\boldsymbol{\theta}_{I^t \setminus (S^t \cup S^*)}^{t+1}\|_2^2 \geq \|\boldsymbol{\theta}_R^{t+1} - \frac{\eta'}{L} \mathbf{g}_R^t\|_2^2. \quad (14)$$

Using above equation, and the fact that  $\boldsymbol{\theta}_R^{t+1} = 0$  (since  $R \subseteq \overline{S^{t+1}}$ ), we have:

$$\begin{aligned} & \frac{L}{2} \|\boldsymbol{\theta}_{I^t}^{t+1} - \boldsymbol{\theta}_{I^t}^t + \frac{\eta'}{L} \cdot \mathbf{g}_{I^t}^t\|_2^2 - \frac{(\eta')^2}{2L} \|\mathbf{g}_{I^t \setminus (S^t \cup S^*)}^t\|_2^2 \\ & \leq \frac{L}{2} \|\boldsymbol{\theta}_{I^t}^{t+1} - \boldsymbol{\theta}_{I^t}^t + \frac{\eta'}{L} \cdot \mathbf{g}_{I^t}^t\|_2^2 - \frac{L}{2} \|\boldsymbol{\theta}_R^{t+1} - \boldsymbol{\theta}_R^t + \frac{\eta'}{L} \mathbf{g}_R^t\|_2^2 \\ & = \frac{L}{2} \|\boldsymbol{\theta}_{I^t \setminus R}^{t+1} - \boldsymbol{\theta}_{I^t \setminus R}^t + \frac{\eta'}{L} \cdot \mathbf{g}_{I^t \setminus R}^t\|_2^2. \end{aligned} \quad (15)$$

We can bound the size of  $I^t \setminus R$  as  $|I^t \setminus R| \leq |S^{t+1}| + |(S^t \setminus S^{t+1}) \setminus R| + |S^*| \leq s + |(S^{t+1} \cap S^*) \setminus S^t| + s^* \leq s + 2s^*$ . Also, since  $S^{t+1} \subseteq (I^t \setminus R)$ , we have  $\boldsymbol{\theta}_{I^t \setminus R}^{t+1} = P_s(\boldsymbol{\theta}_{I^t \setminus R}^t - \frac{\eta'}{L} \mathbf{g}_{I^t \setminus R}^t)$ .

Using the above observation with (15) and Lemma 1, we get:

$$\begin{aligned} & \frac{L}{2} \|\boldsymbol{\theta}_{I^t}^{t+1} - \boldsymbol{\theta}_{I^t}^t + \frac{\eta'}{L} \cdot \mathbf{g}_{I^t}^t\|_2^2 - \frac{(\eta')^2}{2L} \|\mathbf{g}_{I^t \setminus (S^t \cup S^*)}^t\|_2^2 \\ & \leq \frac{L}{2} \cdot \frac{|I^t \setminus R| - s}{|I^t \setminus R| - s^*} \|\boldsymbol{\theta}_{I^t \setminus R}^* - \boldsymbol{\theta}_{I^t \setminus R}^t + \frac{\eta'}{L} \cdot \mathbf{g}_{I^t \setminus R}^t\|_2^2, \\ & \stackrel{\zeta_1}{\leq} \frac{L}{2} \cdot \frac{2s^*}{s + s^*} \|\boldsymbol{\theta}_{I^t}^* - \boldsymbol{\theta}_{I^t}^t + \frac{\eta'}{L} \cdot \mathbf{g}_{I^t}^t\|_2^2, \\ & = \frac{2s^*}{s + s^*} \cdot \left( \eta' \langle \boldsymbol{\theta}^* - \boldsymbol{\theta}^t, \mathbf{g}^t \rangle + \frac{L}{2} \|\boldsymbol{\theta}^* - \boldsymbol{\theta}^t\|_2^2 + \frac{(\eta')^2}{2L} \|\mathbf{g}_{I^t}^t\|_2^2 \right), \\ & \stackrel{\zeta_2}{\leq} \frac{2s^*}{s + s^*} \cdot \left( \eta' f(\boldsymbol{\theta}^*) - \eta' f(\boldsymbol{\theta}^t) + \frac{L - \eta' \alpha}{2} \|\boldsymbol{\theta}^* - \boldsymbol{\theta}^t\|_2^2 + \frac{(\eta')^2}{2L} \|\mathbf{g}_{I^t}^t\|_2^2 \right), \end{aligned} \quad (16)$$

where the inequality  $\zeta_1$  follows by  $|I^t \setminus R| \leq s + 2s^*$  as shown earlier and the observation that  $\frac{x-a}{x-b}$  is a positive and increasing function on the interval  $x \geq a$  if  $a \geq b \geq 0$ . Note that since we have  $S^{t+1} \subseteq (I^t \setminus R)$ , we get  $|I^t \setminus R| \geq s$ . The inequality  $\zeta_2$  follows by using RSC.

Using (13), (16), and using  $S^{t+1} \setminus (S^t \cup S^*) \subseteq (S^{t+1} \cup S^t)$ , we get:

$$\begin{aligned} f(\boldsymbol{\theta}^{t+1}) - f(\boldsymbol{\theta}^t) & \leq \frac{2s^*}{s + s^*} \cdot \left( \eta' f(\boldsymbol{\theta}^*) - \eta' f(\boldsymbol{\theta}^t) + \frac{L - \eta' \alpha}{2} \|\boldsymbol{\theta}^* - \boldsymbol{\theta}^t\|_2^2 + \frac{(\eta')^2}{2L} \|\mathbf{g}_{I^t}^t\|_2^2 \right) \\ & \quad - \frac{(\eta')^2}{2L} \|\mathbf{g}_{S^t \cup S^*}^t\|_2^2 - \frac{\eta'(1 - \eta')}{2L} \|\mathbf{g}_{S^{t+1} \setminus (S^t \cup S^*)}^t\|_2^2. \end{aligned} \quad (17)$$

We now set  $\eta' = 2/3$  as per our earlier choice and set  $s = 32 \left(\frac{L}{\alpha}\right)^2 s^*$ , so that we have  $\frac{2s^*}{s + s^*} \leq \frac{\alpha^2}{16L(L - \eta' \alpha)}$ . Since  $L \geq \alpha$ , we also have  $\frac{\alpha^2}{16L(L - \eta' \alpha)} \leq \frac{3}{16}$ . Using these inequalities, we now rearrange the terms in (17) above.

$$\begin{aligned} f(\boldsymbol{\theta}^{t+1}) - f(\boldsymbol{\theta}^t) & \leq \frac{2s^*}{s + s^*} \cdot \eta' \cdot (f(\boldsymbol{\theta}^*) - f(\boldsymbol{\theta}^t)) + \frac{\alpha^2}{32L} \|\boldsymbol{\theta}^* - \boldsymbol{\theta}^t\|_2^2 + \frac{1}{24L} \|\mathbf{g}_{I^t}^t\|_2^2 \\ & \quad - \frac{2}{9L} \|\mathbf{g}_{S^t \cup S^*}^t\|_2^2 - \frac{1}{9L} \|\mathbf{g}_{S^{t+1} \setminus (S^t \cup S^*)}^t\|_2^2. \end{aligned} \quad (18)$$

Splitting  $\|\mathbf{g}_{I^t}^t\|_2^2 = \|\mathbf{g}_{S^t \cup S^*}^t\|_2^2 + \|\mathbf{g}_{S^{t+1} \setminus (S^t \cup S^*)}^t\|_2^2$  gives us

$$\begin{aligned}
f(\boldsymbol{\theta}^{t+1}) - f(\boldsymbol{\theta}^t) &\leq \frac{2s^*}{s+s^*} \cdot \eta' \cdot (f(\boldsymbol{\theta}^*) - f(\boldsymbol{\theta}^t)) - \frac{1}{2L} \left( \frac{13}{36} \|\mathbf{g}_{S^t \cup S^*}^t\|_2^2 - \frac{\alpha^2}{16} \|\boldsymbol{\theta}^* - \boldsymbol{\theta}^t\|_2^2 \right) \\
&\quad - \frac{1}{2L} \cdot \left( \frac{4}{9} - \frac{1}{12} \right) \|\mathbf{g}_{S^{t+1} \setminus (S^t \cup S^*)}^t\|_2^2, \\
&\leq \frac{2s^*}{s+s^*} \cdot \eta' \cdot (f(\boldsymbol{\theta}^*) - f(\boldsymbol{\theta}^t)) - \frac{13}{72L} \left( \|\mathbf{g}_{S^t \cup S^*}^t\|_2^2 - \frac{\alpha^2}{4} \|\boldsymbol{\theta}^* - \boldsymbol{\theta}^t\|_2^2 \right) \\
&\leq \frac{2s^*}{s+s^*} \cdot \eta' \cdot (f(\boldsymbol{\theta}^*) - f(\boldsymbol{\theta}^t)) - \frac{\alpha}{12L} (f(\boldsymbol{\theta}^t) - f(\boldsymbol{\theta}^*)), \tag{19}
\end{aligned}$$

where the last inequality above follows using Lemma 5. The result now follows by observing that  $\frac{2s^*}{s+s^*} \geq 0$ .  $\square$

**Lemma 5.**

$$\left( \|\mathbf{g}_{S^t \cup S^*}^t\|_2^2 - \frac{\alpha^2}{4} \|\boldsymbol{\theta}^* - \boldsymbol{\theta}^t\|_2^2 \right) \geq \frac{\alpha}{2} \cdot (f(\boldsymbol{\theta}^t) - f(\boldsymbol{\theta}^*)).$$

*Proof.* Using the RSC property, we have:

$$\begin{aligned}
f(\boldsymbol{\theta}^t) - f(\boldsymbol{\theta}^*) &\leq \langle \mathbf{g}^t, \boldsymbol{\theta}^t - \boldsymbol{\theta}^* \rangle - \frac{\alpha}{2} \|\boldsymbol{\theta}^* - \boldsymbol{\theta}^t\|_2^2 \\
&= \langle \mathbf{g}_{S^t \cup S^*}^t, \boldsymbol{\theta}_{S^t \cup S^*}^t - \boldsymbol{\theta}_{S^t \cup S^*}^* \rangle - \frac{\alpha}{2} \|\boldsymbol{\theta}^* - \boldsymbol{\theta}^t\|_2^2, \\
&\leq \|\mathbf{g}_{S^t \cup S^*}^t\|_2 \|\boldsymbol{\theta}^t - \boldsymbol{\theta}^*\|_2 - \frac{\alpha}{2} \|\boldsymbol{\theta}^* - \boldsymbol{\theta}^t\|_2^2. \tag{20}
\end{aligned}$$

Now,

$$\begin{aligned}
\|\mathbf{g}_{S^t \cup S^*}^t\|_2^2 - \frac{\alpha^2}{4} \|\boldsymbol{\theta}^* - \boldsymbol{\theta}^t\|_2^2 &= \left( \|\mathbf{g}_{S^t \cup S^*}^t\|_2 - \frac{\alpha}{2} \|\boldsymbol{\theta}^* - \boldsymbol{\theta}^t\|_2 \right) \left( \|\mathbf{g}_{S^t \cup S^*}^t\|_2 + \frac{\alpha}{2} \|\boldsymbol{\theta}^* - \boldsymbol{\theta}^t\|_2 \right), \\
&\geq \frac{(f(\boldsymbol{\theta}^t) - f(\boldsymbol{\theta}^*))}{\|\boldsymbol{\theta}^t - \boldsymbol{\theta}^*\|_2} \cdot \left( \|\mathbf{g}_{S^t \cup S^*}^t\|_2 + \frac{\alpha}{2} \|\boldsymbol{\theta}^* - \boldsymbol{\theta}^t\|_2 \right) \\
&\geq \frac{\alpha}{2} \cdot (f(\boldsymbol{\theta}^t) - f(\boldsymbol{\theta}^*)), \tag{21}
\end{aligned}$$

where the first inequality above follows from (20).  $\square$

## B Proofs for Section 4

*Proof of Theorem 3.* Let  $\boldsymbol{\theta}^*$  be the empirical loss minimizer over the set of  $s$ -sparse vectors. Then invoking Theorem 1 with  $f = \mathcal{L}(\cdot; Z_{1:n})$ , we get

$$\begin{aligned}
\mathcal{L}(\boldsymbol{\theta}^\tau; Z_{1:n}) - \epsilon &\leq \mathcal{L}(\boldsymbol{\theta}^*, Z_{1:n}) \leq \mathcal{L}(\bar{\boldsymbol{\theta}}, Z_{1:n}) \\
&\leq \mathcal{L}(\boldsymbol{\theta}^\tau; Z_{1:n}) + \langle \nabla \mathcal{L}(\bar{\boldsymbol{\theta}}; Z_{1:n}), (\bar{\boldsymbol{\theta}} - \boldsymbol{\theta}^\tau) \rangle - \frac{\alpha_{s+s^*}}{2} \|\bar{\boldsymbol{\theta}} - \boldsymbol{\theta}^\tau\|_2^2
\end{aligned}$$

where the 2nd inequality is by definition of  $\boldsymbol{\theta}^*$  and 3rd is by RSC (since  $\boldsymbol{\theta}^*$ ,  $\boldsymbol{\theta}^\tau$  are  $s^*$ ,  $s$  sparse). Duality gives us the upper bound

$$\langle \nabla \mathcal{L}(\bar{\boldsymbol{\theta}}; Z_{1:n}), (\bar{\boldsymbol{\theta}} - \boldsymbol{\theta}^\tau) \rangle \leq \|\nabla \mathcal{L}(\bar{\boldsymbol{\theta}}; Z_{1:n})\|_\infty \|\bar{\boldsymbol{\theta}} - \boldsymbol{\theta}^\tau\|_1 \leq \sqrt{s+s^*} \|\nabla \mathcal{L}(\bar{\boldsymbol{\theta}}; Z_{1:n})\|_\infty \|\bar{\boldsymbol{\theta}} - \boldsymbol{\theta}^\tau\|_2$$

Combining the last two inequalities and rearranging gives a quadratic inequality in  $\|\bar{\boldsymbol{\theta}} - \boldsymbol{\theta}^\tau\|_2$ :

$$\frac{\alpha_{s+s^*}}{2} \|\bar{\boldsymbol{\theta}} - \boldsymbol{\theta}^\tau\|_2^2 - \sqrt{s+s^*} \|\nabla \mathcal{L}(\bar{\boldsymbol{\theta}}; Z_{1:n})\|_\infty \|\bar{\boldsymbol{\theta}} - \boldsymbol{\theta}^\tau\|_2 - \epsilon \leq 0$$

that immediately yields the result.  $\square$

## C Proofs for Section 5

*Proof of Lemma 3.* We will start by proving a more general result of which the claimed result will be a corollary. More specifically, we shall prove that for any  $\gamma \geq \frac{1}{\alpha}$ , we have

$$2\gamma(f(\boldsymbol{\theta}^t) - f(\boldsymbol{\theta}^*)) \leq 2\gamma \left( f(\boldsymbol{\theta}^t) - f(\boldsymbol{\theta}^*) + \frac{\alpha}{2} \cdot \left( 1 - \frac{1}{\alpha\gamma} \right) \|\boldsymbol{\theta}^t - \boldsymbol{\theta}^*\|_2^2 \right) \leq \gamma^2 \|\mathbf{g}_{S^t \cup S^*}^t\|_2^2 - \|\boldsymbol{\theta}_{S^t \setminus S^*}^t\|_2^2,$$

Setting  $\gamma = \frac{1}{\alpha}$  will yield the claimed result. It is easy to see that the following inequality holds trivially since  $\gamma \geq \frac{1}{\alpha}$

$$2\gamma(f(\boldsymbol{\theta}^t) - f(\boldsymbol{\theta}^*)) \leq 2\gamma \left( f(\boldsymbol{\theta}^t) - f(\boldsymbol{\theta}^*) + \frac{\alpha}{2} \cdot \left( 1 - \frac{1}{\alpha\gamma} \right) \|\boldsymbol{\theta}^t - \boldsymbol{\theta}^*\|_2^2 \right).$$

For the second inequality, we first use the RSC condition to obtain:

$$f(\boldsymbol{\theta}^*) - f(\boldsymbol{\theta}^t) \geq \langle \boldsymbol{\theta}^* - \boldsymbol{\theta}^t, \mathbf{g}^t \rangle + \frac{\alpha}{2} \|\boldsymbol{\theta}^t - \boldsymbol{\theta}^*\|_2^2.$$

Now let  $MD_t = S^* \setminus S^t$  be the set of true support elements missing from  $\boldsymbol{\theta}^t$  and  $FA_t = S^t \setminus S^*$  be the set of incorrect elements included in the support of  $\boldsymbol{\theta}^t$ . Since  $\boldsymbol{\theta}^t$  is obtained by a “fully corrective” process (recall  $\boldsymbol{\theta}^t = \arg \min_{\boldsymbol{\theta}, \text{supp}(\boldsymbol{\theta}) \subseteq S^t} f(\boldsymbol{\theta})$ ), we have  $\mathbf{g}_{S^t}^t = \mathbf{0}$ . Thus  $\langle \boldsymbol{\theta}^* - \boldsymbol{\theta}^t, \mathbf{g}^t \rangle = \langle \boldsymbol{\theta}_{MD_t}^*, \mathbf{g}_{MD_t}^t \rangle$ .

Putting this into the above expansion gives

$$\langle \boldsymbol{\theta}_{MD_t}^*, \mathbf{g}_{MD_t}^t \rangle \leq f(\boldsymbol{\theta}^*) - f(\boldsymbol{\theta}^t) - \frac{\alpha}{2} \|\boldsymbol{\theta}^t - \boldsymbol{\theta}^*\|_2^2 \quad (22)$$

We now present some simple inequalities that will help us get our desired bounds. Firstly, we have

$$\|\boldsymbol{\theta}_{MD_t}^* + \gamma \mathbf{g}_{MD_t}^t\|_2^2 = \|\boldsymbol{\theta}_{MD_t}^*\|_2^2 + \gamma^2 \|\mathbf{g}_{MD_t}^t\|_2^2 + 2\gamma \langle \boldsymbol{\theta}_{MD_t}^*, \mathbf{g}_{MD_t}^t \rangle \geq 0, \quad (23)$$

since the first expression is a norm. Next, since  $MD_t \cap FA_t = \emptyset$ , we have

$$\|\boldsymbol{\theta}^* - \boldsymbol{\theta}^t\|_2^2 \geq \|\boldsymbol{\theta}_{MD_t}^*\|_2^2 + \|\boldsymbol{\theta}_{FA_t}^t\|_2^2. \quad (24)$$

Putting equations 22 and 23, we have:

$$2\gamma \left( f(\boldsymbol{\theta}^t) - f(\boldsymbol{\theta}^*) + \frac{\alpha}{2} \|\boldsymbol{\theta}^t - \boldsymbol{\theta}^*\|_2^2 \right) \leq \|\boldsymbol{\theta}_{MD_t}^*\|_2^2 + \gamma^2 \|\mathbf{g}_{MD_t}^t\|_2^2. \quad (25)$$

Now, using (24), we get:

$$2\gamma \left( f(\boldsymbol{\theta}^t) - f(\boldsymbol{\theta}^*) + \frac{\alpha}{2} \left( 1 - \frac{1}{\alpha\gamma} \right) \|\boldsymbol{\theta}^t - \boldsymbol{\theta}^*\|_2^2 \right) \leq \gamma^2 \|\mathbf{g}_{MD_t}^t\|_2^2 - \|\boldsymbol{\theta}_{FA_t}^t\|_2^2$$

We finish off the proof by noticing that since  $\mathbf{g}_{S^t}^t = \mathbf{0}$ , we have  $\|\mathbf{g}_{MD_t}^t\|_2^2 = \|\mathbf{g}_{S^t \cup S^*}^t\|_2^2$   $\square$

*Proof of Theorem 4.* Let  $\mathbf{z}_{S^t}^t = \boldsymbol{\theta}_{S^t}^t$ ,  $\mathbf{z}_{Z^t \setminus S^t}^t = -\frac{1}{L} \mathbf{g}_{Z^t \setminus S^t}^t$ , and  $\mathbf{z}_{\overline{Z^t}}^t = \mathbf{0}$ .

Then, using the RSS property, we have:

$$\begin{aligned} f(\mathbf{z}^t) - f(\boldsymbol{\theta}^t) &\leq \langle \mathbf{z}^t - \boldsymbol{\theta}^t, \mathbf{g}^t \rangle + \frac{L}{2} \|\mathbf{z}^t - \boldsymbol{\theta}^t\|_2^2, \\ &\stackrel{\zeta_1}{\leq} -\frac{1}{L} \|\mathbf{g}_{Z^t \setminus S^t}^t\|_2^2 + \frac{L}{2} \|\mathbf{z}_{Z^t \setminus S^t}^t\|_2^2, \\ &\stackrel{\zeta_2}{=} -\frac{1}{2L} \cdot \|\mathbf{g}_{Z^t \setminus S^t}^t\|_2^2, \\ &\stackrel{\zeta_3}{\leq} -\frac{1}{2L} \cdot \|\mathbf{g}_{S^* \setminus S^t}^t\|_2^2, \\ &\stackrel{\zeta_4}{\leq} -\frac{\alpha}{L} \cdot (f(\boldsymbol{\theta}^t) - f(\boldsymbol{\theta}^*)), \end{aligned} \quad (26)$$

where  $\zeta_1$  follows by observing  $\mathbf{g}_{S^t}^t = \mathbf{0}$ , and  $S^t \subseteq Z^t$ .  $\zeta_2$  follows by  $\mathbf{z}_{Z^t \setminus S^t}^t = -\frac{1}{L} \mathbf{g}_{Z^t \setminus S^t}^t$ .  $\zeta_3$  follows by  $\ell \geq s^*$ , and  $Z^t \setminus S^t$  are the  $\ell$  largest elements of  $|\mathbf{g}_{Z^t \setminus S^t}^t|$ .

Now, using Lemma 4 and (26) along with  $f(\boldsymbol{\theta}^{t+1}) \leq f(\tilde{\boldsymbol{\theta}}^t)$  and  $f(\boldsymbol{\beta}^t) \leq f(\mathbf{z}^t)$ , we have:

$$f(\boldsymbol{\theta}^{t+1}) - f(\boldsymbol{\theta}^*) \leq \left( 1 - \frac{\alpha}{L} \right) \cdot \left( 1 + \frac{L}{\alpha} \cdot \frac{\ell}{s + \ell - s^*} \right) \cdot (f(\boldsymbol{\theta}^t) - f(\boldsymbol{\theta}^*)). \quad (27)$$

Theorem now follows by using the above equation with the assumption that  $s + \ell - s^* \geq \frac{4L^2 \cdot \ell}{\alpha^2}$ .  $\square$

## D Supplementary Experimental Results

Below we present plots that were not included in the main text.

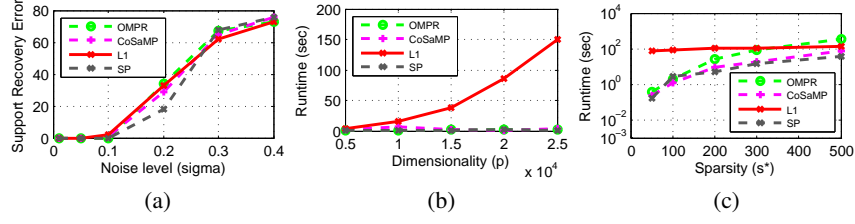

Figure 2: Counterparts of Figure 1 for OMPR, CoSaMP and L1.

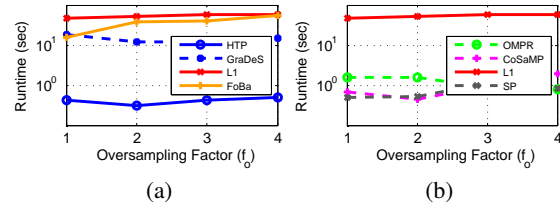

Figure 3: The effect of increasing sample sizes relative to the base value  $s^* \cdot \log p$  on runtime.
